# Supplementary material for: Inhibition of JAK‐STAT ERK/MAPK and Glycogen Synthase Kinase‐3 Induces a Change in Gene Expression Profile of Bovine Induced Pluripotent Stem Cells
Source: Hindawi journal article supplement (doi:10.1155/2016/5127984), 2016-01-01
Supplement: f1 [file 5127984.f1.pdf]

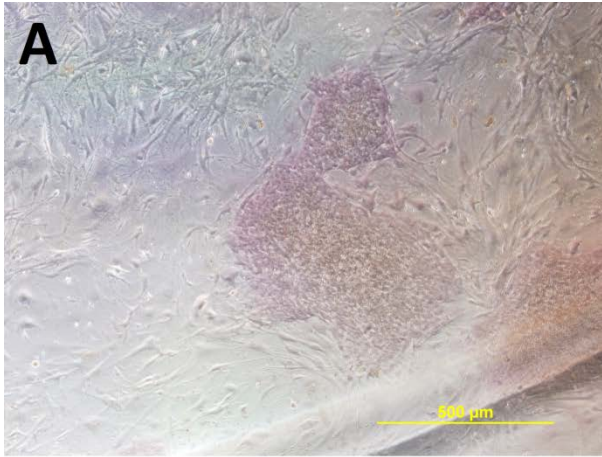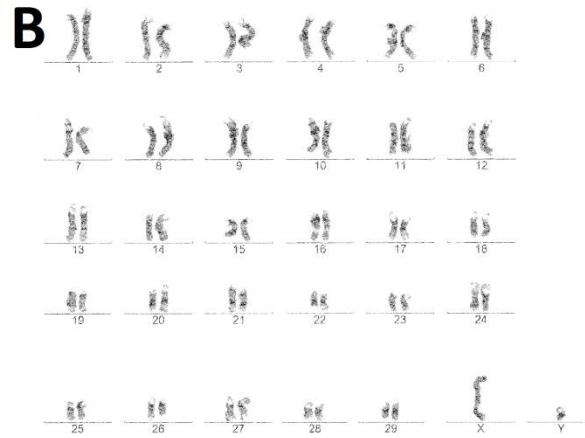

Figure S1 (A) Alkaline phosphate assay on biPSC colonies, Cells were weakly positive. (B) Normal bovine karyotype displayed by the biPSC generated.

Table S1 List of primers

| Primer      | Sequence                           | Length | Tm    | GC%   | P.S   | t° | Ref               |
|-------------|------------------------------------|--------|-------|-------|-------|----|-------------------|
| pMxhOCT4    | <i>CTAGTTAATTAAGAATCCCAGTG</i>     | 23     | 46.6  | 34.8  | 300.0 | 58 | Sumer et al. 2011 |
|             | <i>CACTAGCCCCACTCCAACCT</i>        | 20     | 55.2  | 60.0  |       |    |                   |
| pMxhSOX2    | <i>CTAGTTAATTAAGGATCCCAGG</i>      | 22     | 53.1  | 40.9  | 300.0 | 58 | Sumer et al. 2011 |
|             | <i>TGTTGTGCATCTTGGGGTTCT</i>       | 21     | 60.1  | 47.6  |       |    |                   |
| pMx hKLF4   | <i>ACAAAGAGTTCCTCAAGGTG</i>        | 24     | 60.8  | 45.8  | 250.0 | 58 | Sumer et al. 2011 |
|             | <i>TCCAAGCTAGCTTGCCAAACCTACAGG</i> | 27     | 66.8  | 51.9  |       |    |                   |
| pMxhc-MYC   | <i>CTAGTTAATTAAGGATCCCAGTG</i>     | 23     | 54.0  | 39.1  | 500.0 | 58 | Sumer et al. 2011 |
|             | <i>CAGCAGCTCGAATTTCTTCC</i>        | 20     | 57.2  | 50.0  |       |    |                   |
| pMX-hNanog  | <i>CTAGTTAATTAAGAATCCCAGTG</i>     | 23     | 52.4  | 34.8  | 550.0 | 58 | Sumer et al. 2011 |
|             | <i>GGGTAGGTAGGTGCTGAGGC</i>        | 20     | 61.7  | 65.0  |       |    |                   |
| SOX2        | <i>CATCCACAGCAAATGACAGC</i>        | 20     | 57.7  | 50.0  | 251.0 | 58 | Sumer et al. 2011 |
|             | <i>TTTCTGCAAAGCTCCTACCG</i>        | 20     | 58.2  | 50.0  |       |    |                   |
| POU5F1      | <i>GTTCTCTTTGAAAGGTGTTTC</i>       | 21     | 49.3  | 42.9  | 313.0 | 58 | Sumer et al. 2011 |
|             | <i>ACACTCGGACCACGCTTTTC</i>        | 20     | 54.2  | 55.0  |       |    |                   |
| NANOG       | <i>GTGTTTGGTGAAGCTCTCTG</i>        | 20     | 50.6  | 50.0  | 308   | 58 | Sumer et al. 2011 |
|             | <i>GGGAATTGAAATACTTGACAG</i>       | 21     | 46.8  | 38.1  |       |    |                   |
| KLF4        | <i>GCCCCTAGAGGCCACTT</i>           | 18     | 54.7  | 66.7  | 455   | 58 | Sumer et al. 2011 |
|             | <i>CACAACCATCCCAGTCACAG</i>        | 20     | 52.7  | 55.0  |       |    |                   |
| c-MYC       | <i>CGCGGTGCTCCTTCTCGCCAGG</i>      | 25     | 68.7  | 76.0  | 412   | 58 | Sumer et al. 2011 |
|             | <i>GTCCGGGGAAGCGCAGGGC</i>         | 19     | 62.6  | 79.0  |       |    |                   |
| GAPDH       | <i>ACCCAGAAGACTGTGGATGG</i>        | 20     | 59.0  | 55.0  | 247   | 60 | Gad et al, 2012   |
|             | <i>ACGCCTGCTTCACCACCTT</i>         | 19     | 62.1  | 57.9  |       |    |                   |
| POU5F1      | <i>GTTTTGAGGCTTTCAGCTC</i>         | 20     | 58.22 | 50    | 182   | 55 | Gad et al, 2012   |
|             | <i>CTCCAGGTTGCCTCTCACTC</i>        | 20     | 59.75 | 60    |       |    |                   |
| Oct4 3'UTR  | <i>GGGTTTGTACTAGGGCTTTGGG</i>      | 22     | 60.88 | 54.55 | 124   | 55 | Han et al, 2011   |
|             | <i>GCATCATTGAACCTCACCTCCCT</i>     | 24     | 61.35 | 45.83 |       |    |                   |
| Sox2-3'UTR  | <i>GCACGGCCATTAACGGCACAC</i>       | 21     | 65.25 | 61.9  | 126   | 60 | Han et al, 2011   |
|             | <i>CTCCATGCTGTTTCTTGCTGCTCCTC</i>  | 25     | 64.04 | 52    |       |    |                   |
| Nanog 3'UTR | <i>TCTGTGTCAGTTTGAGGGACAGG</i>     | 23     | 62.07 | 52.17 | 234   | 60 | Han et al, 2011   |
|             | <i>AACAAGTAAAGCCTCCCTATCCCA</i>    | 24     | 61.32 | 45.83 |       |    |                   |
| Rex1        | <i>CACTGCTTCGATTACAACCCAG</i>      | 25     | 63.31 | 52    | 231   | 60 | Han et al, 2011   |
|             | <i>CCACGTACTTACTGCTGGAGATGGG</i>   | 25     | 64.62 | 56    |       |    |                   |
